# Supplementary material
Source: PubMed Central journal article supplement (PMC9474643)
Supplement: NIHMS1830668-supplement-Supplemental_material.pdf [file NIHMS1830668-supplement-Supplemental_material.pdf]

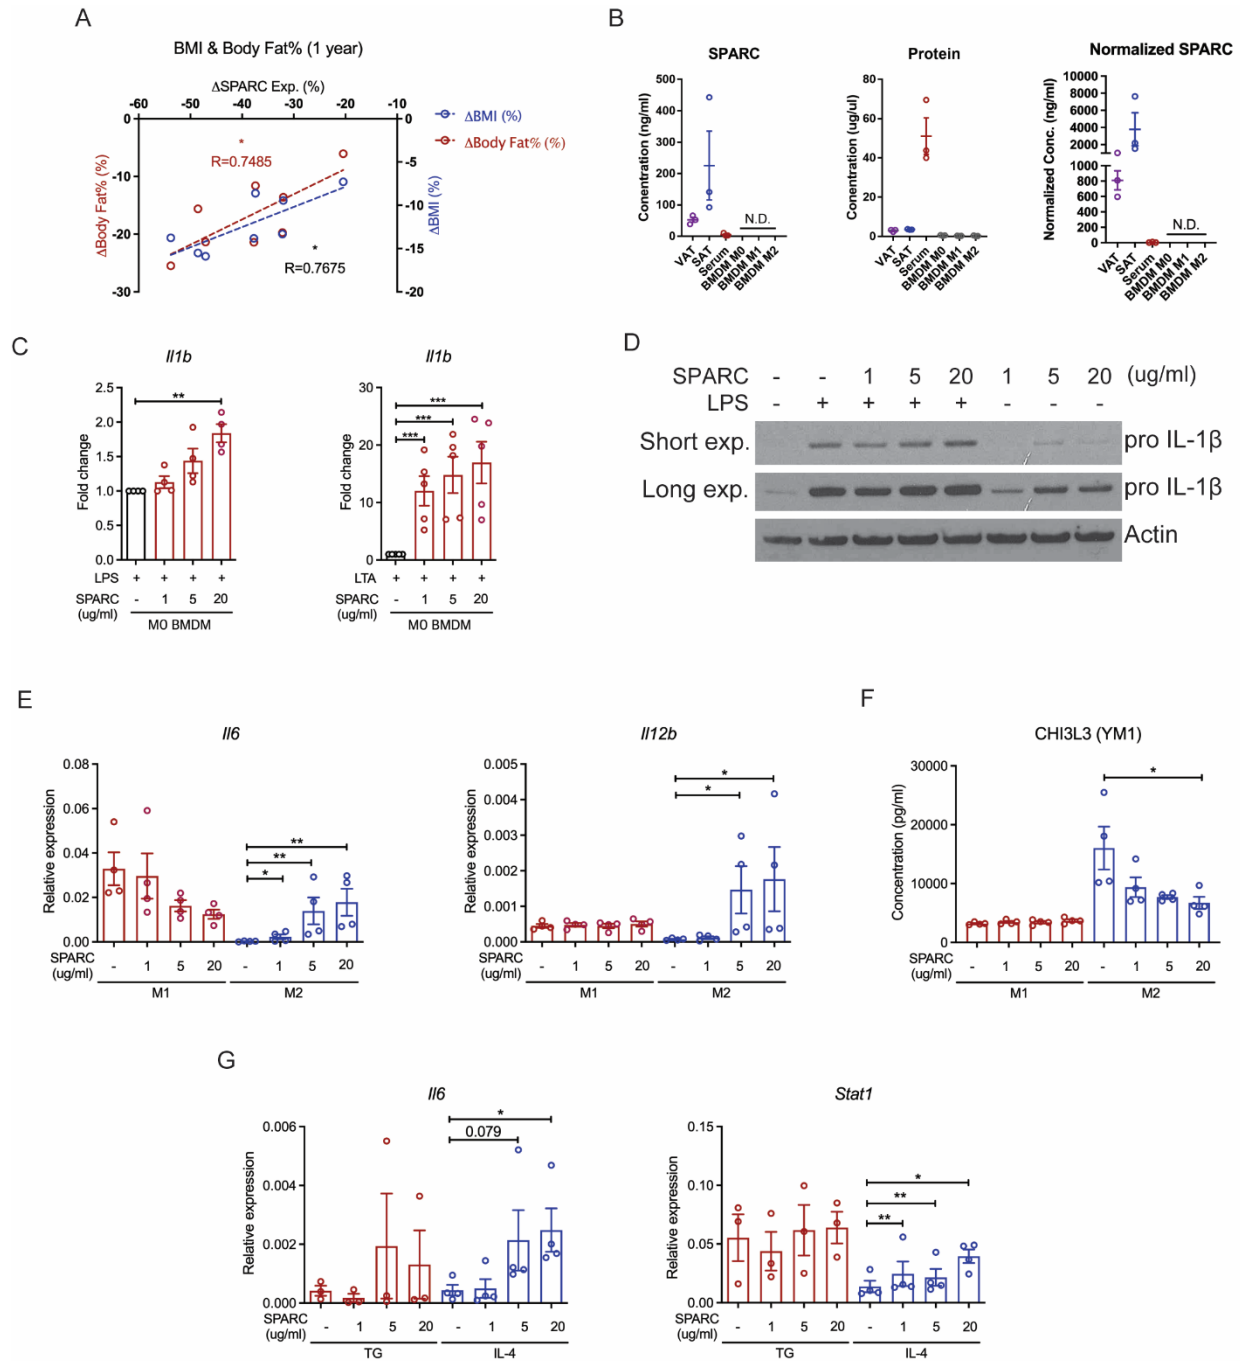

**Figure S1. SPARC upregulates pro-inflammatory genes in macrophages, Related to Figure 1, 2.** (A) Correlation analysis between the percentage of *SPARC* expression change and percentage of BMI, Body Fat% changes of participants after 1 year of CR. (B) Measurement of SPARC concentrations with or without normalization by total protein concentrations in serum,

VAT, SAT, BMDMs. N.D. indicates non-detected. (C) Q-PCR analysis for *Il1b* in M0 BMDMs after treatment of LPS (n=4) or LTA (n=5) with SPARC (1, 5, and 20 µg/ml) for 24 hours. (D) Immunoblot analysis for pro IL-1β in BMDMs after treatment of SPARC (1, 5, and 20 µg/ml) with or without LPS for 24 hours. (E) Gene expression analysis by Q-PCR for pro-inflammatory genes (*Il6*, *Il12b*) with the treatment of SPARC (1, 5, and 20 µg/ml) to M1 and M2 polarized BMDMs (n=4). (F) ELISA assay to detect M2 macrophage protein, YM1 and CHI3L3 in supernatants of SPARC treated M1 and M2 polarized BMDMs (n=4). (G) Gene expression analysis by Q-PCR for pro-inflammatory gene *Il6* and *Stat1* in controls and *ex vivo* SPARC treated peritoneal macrophages from thioglycollate (TG) or IL-4 complex injected (IL-4) mice (n=3, 4 each). All experiments were repeated independently at least twice. Error bars represent the mean ± S.E.M. Pearson correlation analysis, and two-tailed paired t-tests were performed for statistical analysis. \* P < 0.05; \*\* P < 0.01; \*\*\* P < 0.001.

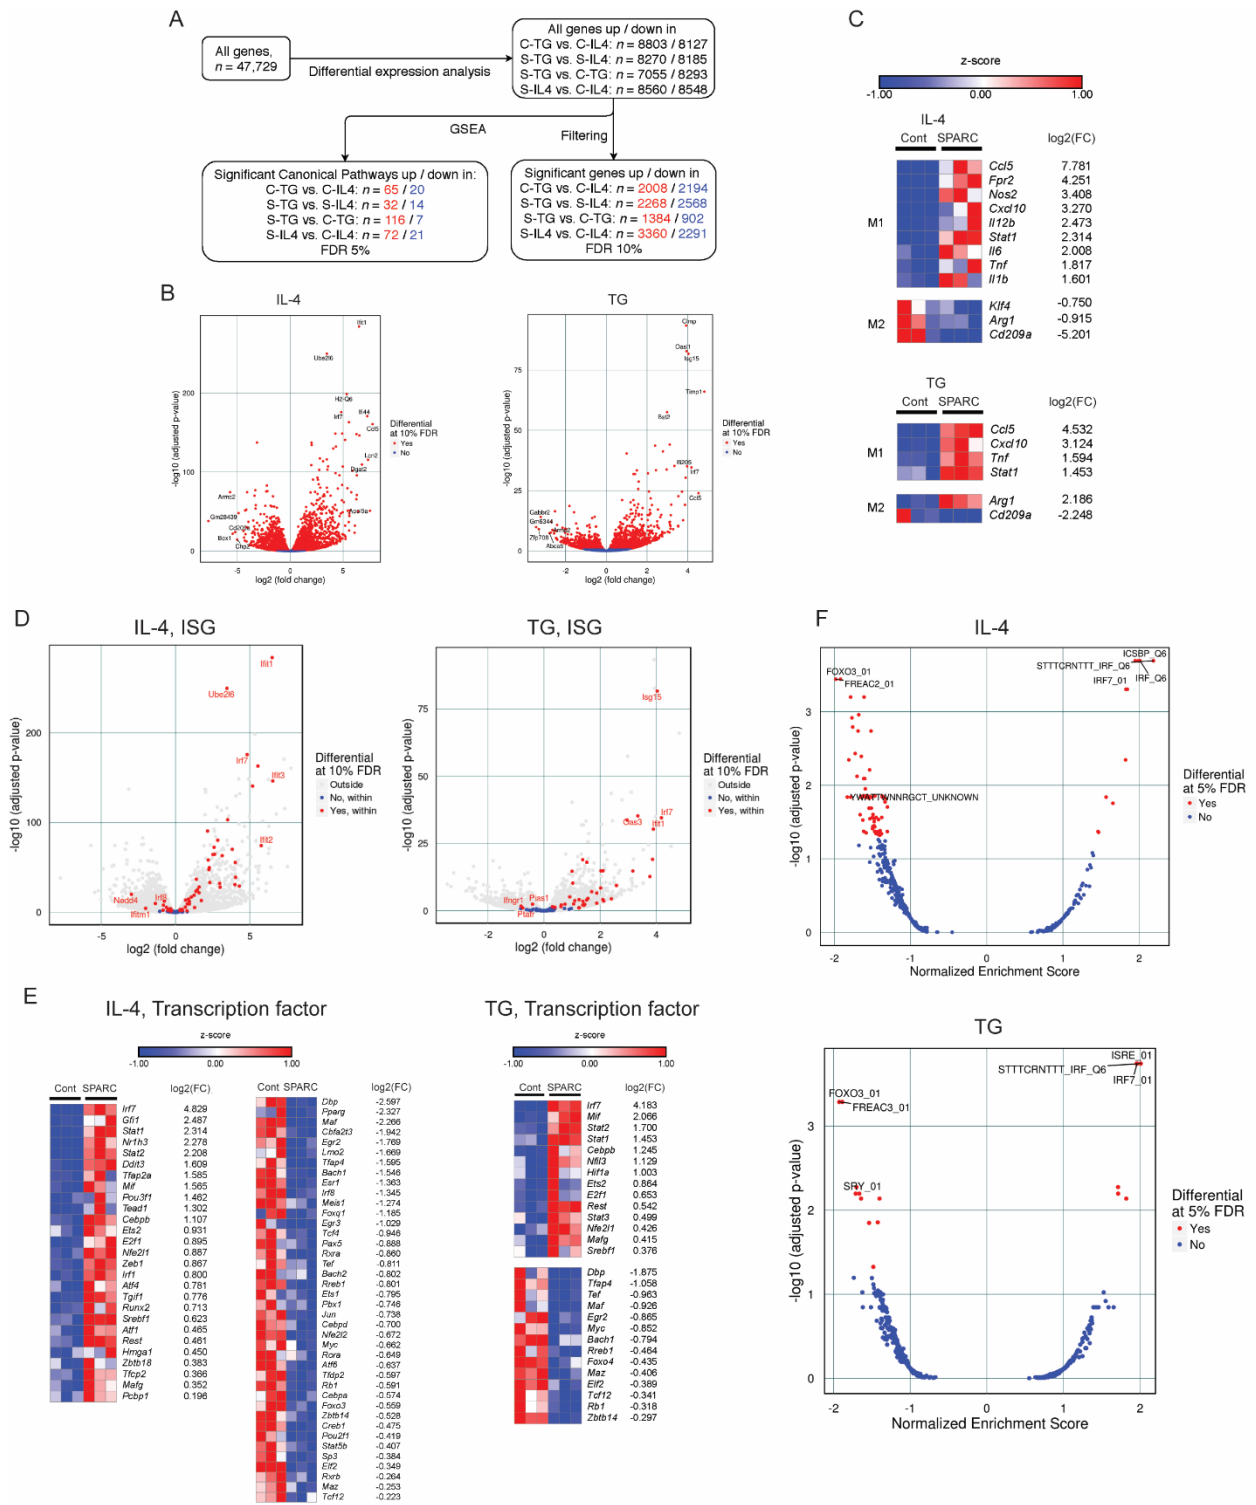

**Figure S2. SPARC shifts transcriptomic profiles of macrophages with ISG induction,**

**Related to Figure 3. (A) Workflow for differential gene expression and GSEA pathway analysis of RNA-sequencing results. (B) Volcano plots for significantly (red dots) and non-significantly**

(blue dots) differentially expressed genes between controls and SPARC treated peritoneal macrophages from IL-4c injected (IL-4, left) and thioglycollate injected (TG, right) mice. (C) M1 and M2 marker gene expression patterns in controls and SPARC treated peritoneal macrophages from IL-4 complex injected (IL-4, upper) and thioglycollate injected (TG, lower) mice. (D) Volcano plots for significantly changed (red dots) and non-significantly changed (blue dots) interferon response genes (IGSs) with SPARC treatment to peritoneal macrophages from IL-4 complex injected (IL-4, left) and thioglycollate injected (TG, right) mice. (E) Significantly up or down-regulated transcription factors after treatment of SPARC to peritoneal macrophages from IL-4 complex injected (IL-4, left) and thioglycollate injected (TG, right) mice. (F) Transcription factor binding motifs significantly enriched around the transcription start sites of up-regulated (positive normalized enrichment score) or down-regulated (negative normalized enrichment score) genes by SPARC treatment in peritoneal macrophages from IL-4 complex injected (IL-4, upper) or thioglycollate injected (TG, lower) mice.

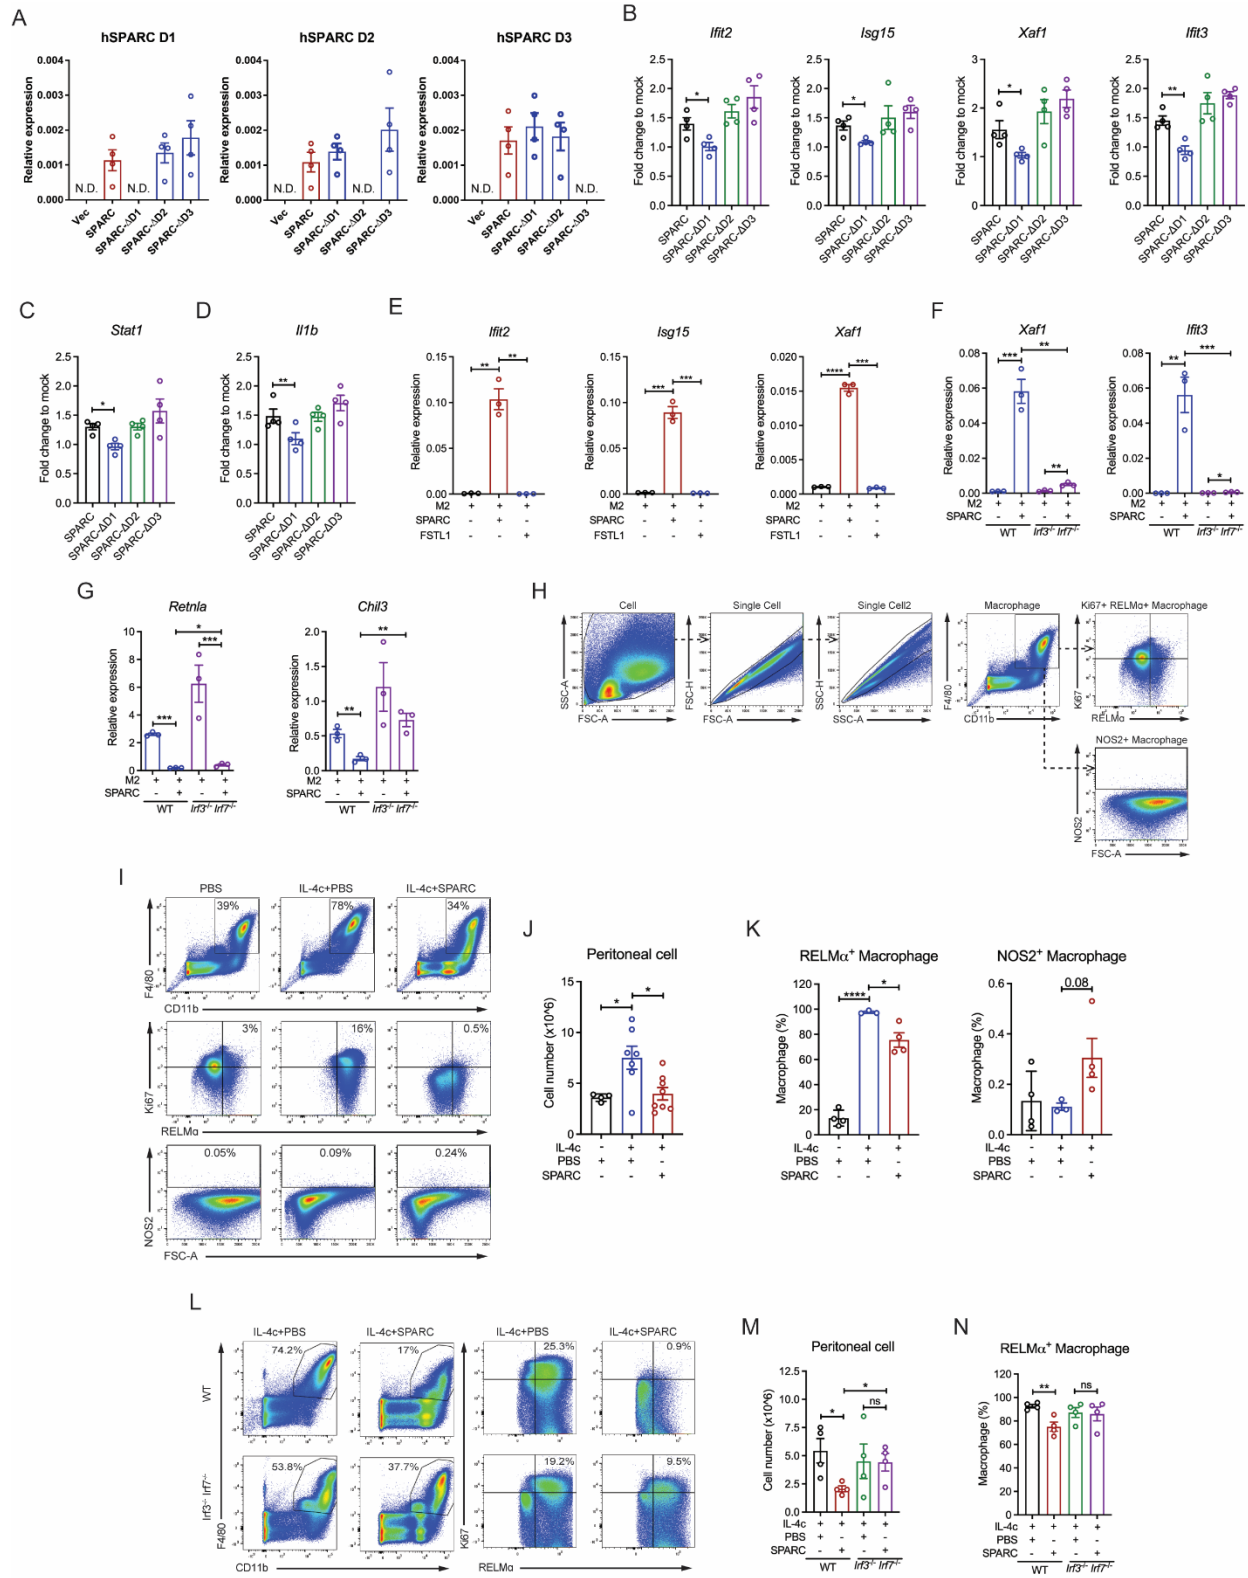

**Figure S3. SPARC induces ISGs through IRF3 and IRF7 signaling, Related to Figure 4. (A)**

Q-PCR analysis for specific SPARC domain (D1, D2, D3) in mock vector, intact SPARC, and

domain deleted SPARC ( $\Delta D1$ ,  $\Delta D2$ ,  $\Delta D3$ ) transfected RAW 264.7 cell lines (n=4). (B-D) Q-PCR analysis for ISGs (B), *Stat1* (C), and *Il1b* (D) in SPARC and domain deleted SPARC ( $\Delta D1$ ,  $\Delta D2$ ,  $\Delta D3$ ) transfected RAW 264.7 cell lines (n=4). Fold changes were calculated based on mock vector-transfected RAW 264.7 cell lines. (E) Q-PCR analysis for ISGs in M2 polarized BMDMs with 20  $\mu\text{g/ml}$  SPARC or FSTL1 treatment for 24 hours and non-treated controls (n=3) (F, G) Q-PCR analysis for ISGs (F) and M2 genes (G) in M2 polarized BMDMs from wide-type (WT) and *Irf3*<sup>-/-</sup> *Irf7*<sup>-/-</sup> mice with or without 20  $\mu\text{g/ml}$  SPARC treatment for 24 hours (n=3). (H) Representative flow cytometry plots showing the gating strategy to detect macrophages, Ki67<sup>+</sup> RELM $\alpha$ <sup>+</sup> macrophages, and NOS2<sup>+</sup> macrophages in peritoneal cells. (I) Representative flow cytometry plots of peritoneal cells from PBS, IL-4c with PBS, and IL-4c with SPARC injected mice. Percentages of macrophages (F4/80<sup>+</sup> CD11b<sup>+</sup>, top), proliferating M2 macrophages (Ki67<sup>+</sup> RELM $\alpha$ <sup>+</sup>, middle), and pro-inflammatory macrophages (NOS2<sup>+</sup>, bottom) were indicated. (J, K) Peritoneal cell numbers (n=4, 8, 8) (J) and quantification of flow cytometry analysis for RELM $\alpha$ <sup>+</sup> M2 and pro-inflammatory macrophages in peritoneal cells (n=4, 3, 4) (K) from PBS, IL-4c with PBS, or IL-4c with SPARC injected mice. (L) Representative flow cytometry plots for peritoneal cells from IL-4c with PBS or IL-4c with SPARC injected WT and *Irf3*<sup>-/-</sup> *Irf7*<sup>-/-</sup> mice. Percentages of macrophages and proliferating M2 macrophages were indicated. (M, N) Numbers of peritoneal cells (M) and quantification of flow cytometry analysis for RELM $\alpha$ <sup>+</sup> M2 macrophages (N) from IL-4c with PBS or IL-4c with SPARC injected WT and *Irf3*<sup>-/-</sup> *Irf7*<sup>-/-</sup> mice (n=4 each). All experiments were repeated independently at least twice. Error bars represent the mean  $\pm$  S.E.M. Two-tailed paired and unpaired t-tests were performed for statistical analysis. \* P < 0.05; \*\* P < 0.01; \*\*\* P < 0.001.

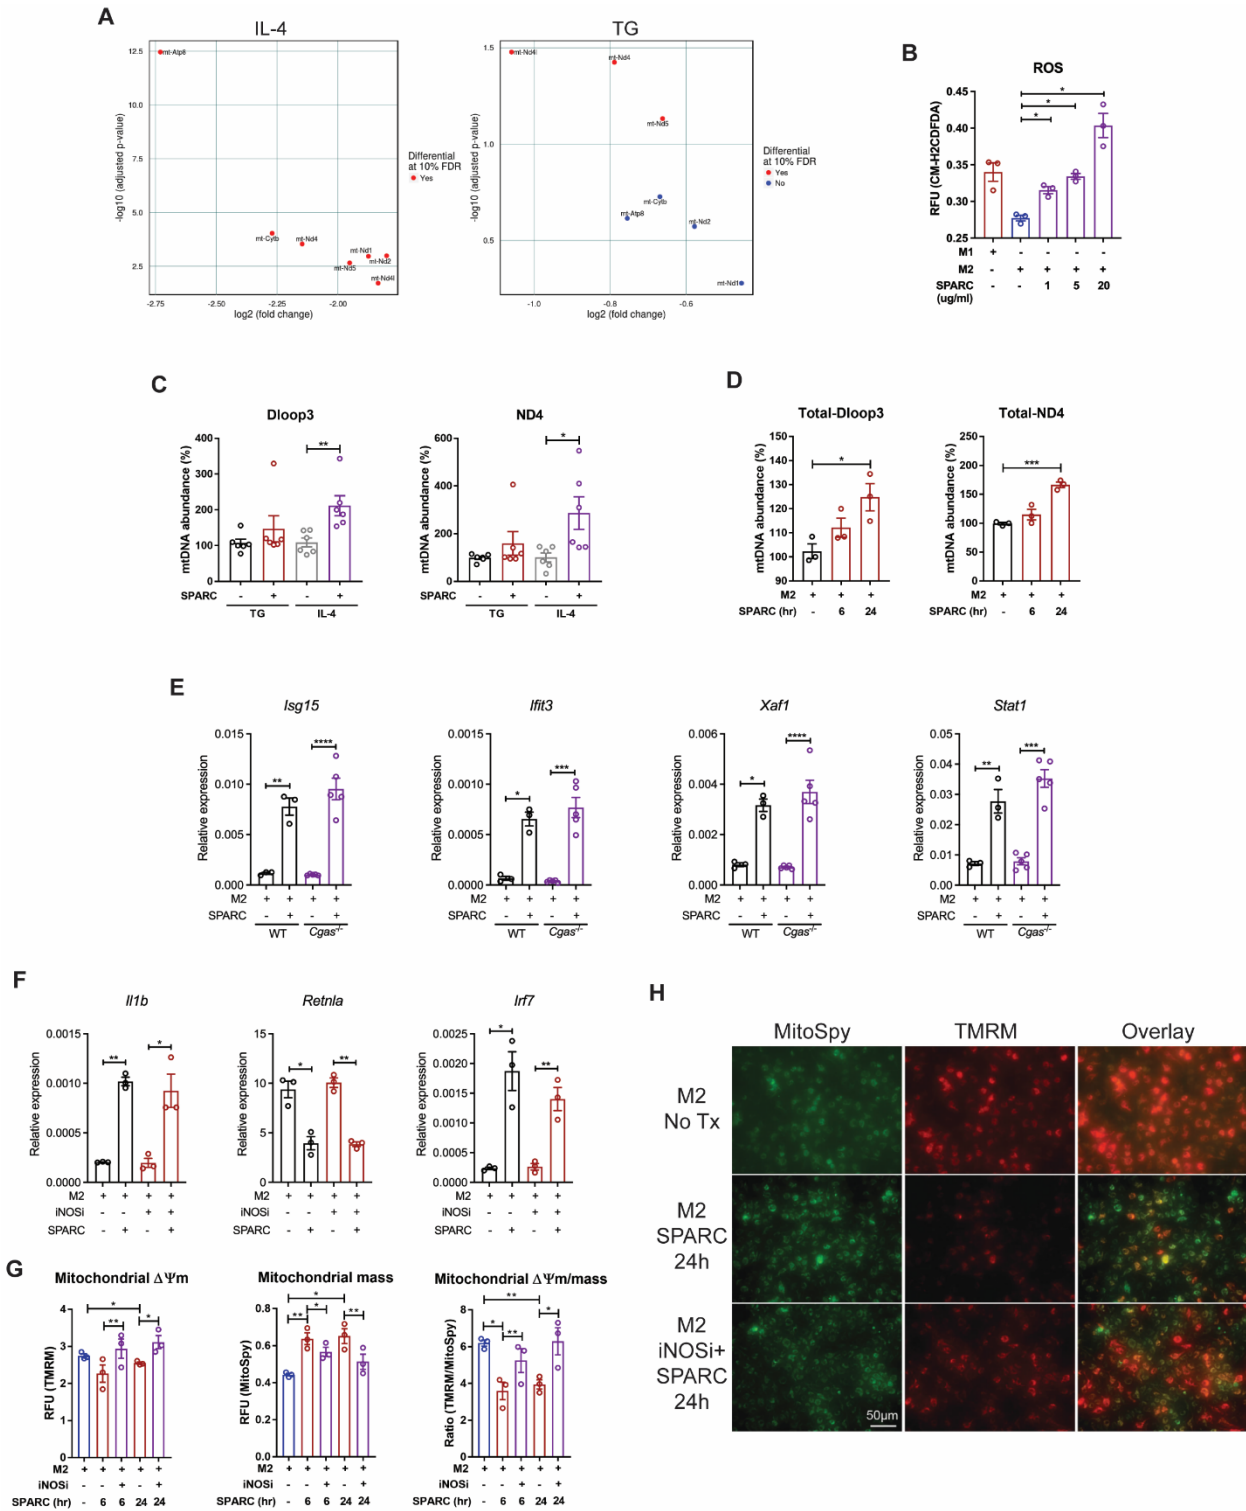

**Figure S4. cGAS activation is not required for SPARC-induced ISG induction, Related to Figure 4.** (A) PCA plots for mitochondrial genes in RNA-sequencing analysis of peritoneal

macrophages from IL-4c injected (IL-4, left), and thioglycollate injected (TG, right) mice with SPARC treatment *ex vivo* (n=3). (B) ROS measurement by CM-H2CFDA assay in non-treated or 1, 5, 20  $\mu\text{g/ml}$  SPARC treated (24 hours) M2 polarized BMDMs, and M1 polarized BMDMs (n=3) (C) Mitochondrial DNA abundance measurement in peritoneal macrophages from IL-4c injected (IL-4), and thioglycollate injected (TG) mice with or without SPARC treatment *ex vivo* by Q-PCR for Dloop3 and ND4 (n=6). (D) Total mitochondrial DNA abundance measurement in M2 BMDMs with or without SPARC treatment for 6 and 24 hours by Q-PCR for Dloop3 and ND4 (n=3). (E) Gene expression analysis by Q-PCR for ISGs and *Stat1* in BMDMs from wide-type (WT) and *Cgas*<sup>-/-</sup> mice with or without SPARC treatment (20  $\mu\text{g/ml}$ ) for 24 hours (n=3, 5). (F) Q-PCR analysis for *Il1b*, *Retnla*, and *Irf7* in 20  $\mu\text{g/ml}$  SPARC treated (24 hours) M2 polarized BMDMs with or without pre-treatment of iNOS inhibitor (L-NIL, 40  $\mu\text{M}$ ) and non-treated controls (n=3). (G, H) Quantification (G) and representative images (H) for mitochondrial functional assays in 20  $\mu\text{g/ml}$  SPARC treated (24 hours) M2 polarized BMDMs with or without pre-treatment of iNOS inhibitor (L-NIL, 40  $\mu\text{M}$ ) and non-treated controls (n=3). MitoSpy, TMRM assay were used to measure each mitochondrial mass and membrane potential ( $\Delta\psi$ ). Scale bar represents 50  $\mu\text{m}$ . All experiments were repeated independently at least twice. Error bars represent the mean  $\pm$  S.E.M. Two-tailed paired t-tests were performed for statistical analysis. \* P < 0.05; \*\* P < 0.01; \*\*\* P < 0.001; \*\*\*\* P < 0.0001.



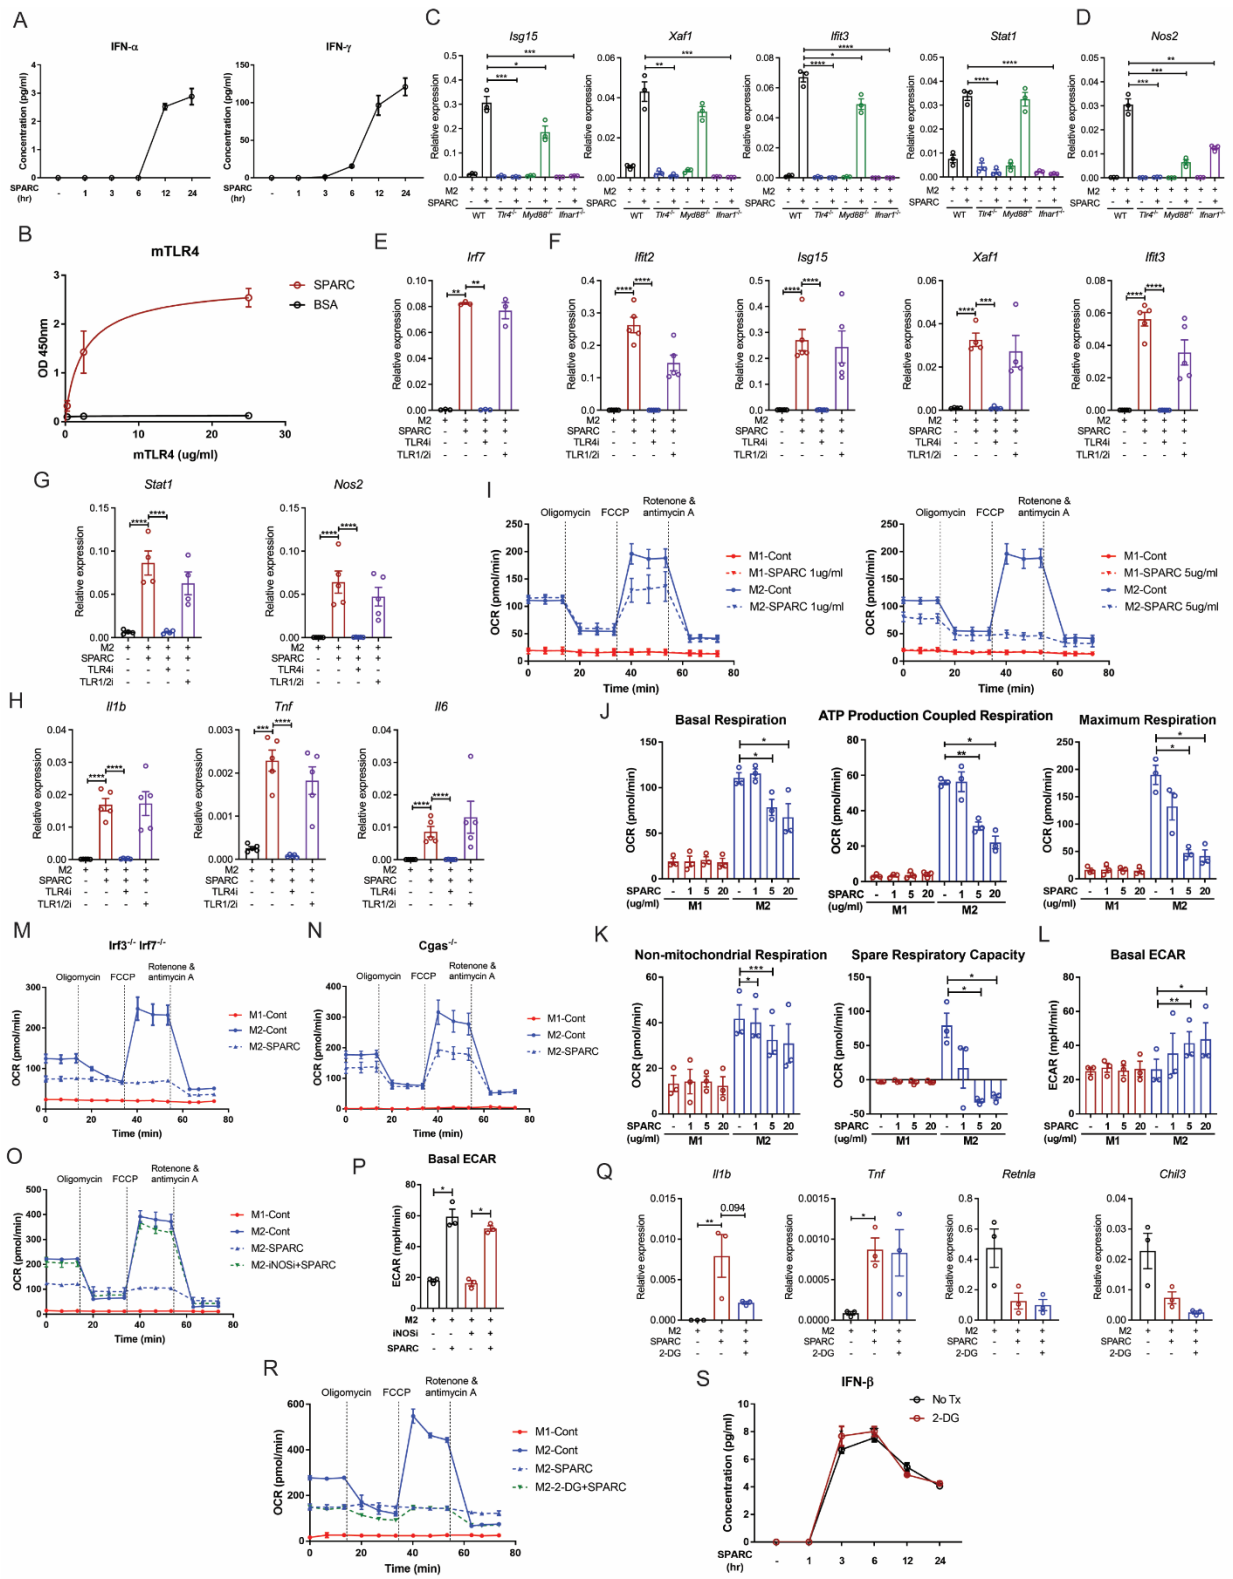

**Figure S5. Induction of IGSs was mediated by TLR4 and interferon signaling, Related to**

**Figure 5. (A) ELISA assays for IFN- $\alpha$  and IFN- $\gamma$  detection in supernatants of M2 BMDMs non-**

treated or treated with 20 µg/ml SPARC for 1, 3, 6, 12, and 24 hours (n=3). (B) Solid-phase binding assay to detect the interaction between SPARC and mouse TLR4 (mTLR). The indicated amount of TLR4s was coated on plates, and 20 µg/ml SPARC or BSA were added for interaction (n=3). Nonlinear regression analyses were performed for the values in the graph. (C, D) Gene expression analysis by Q-PCR for ISGs, *Stat1* (C), and *Nos2* (D) in M2 polarized BMDMs from wide-type (WT), *Tlr4*<sup>-/-</sup>, *Myd88*<sup>-/-</sup>, and *Ifnar1*<sup>-/-</sup> mice with or without SPARC (20 µg/ml) treatment (n=3). (E-H) Gene expression analysis by Q-PCR for *Irf7* (E), ISGs (F), *Stat1*, *Nos2* (G), and pro-inflammatory genes (H) in non-treated and SPARC (20 µg/ml) treated M2 polarized BMDMs with TLR4 inhibitor (TAK-242, 2.5 µM) or TLR1 and TLR2 inhibitor (CU-CPT22, 8 µM)-pre-treatment (n=3). (I) Oxygen consumption rate (OCR) for M1 and M2 BMDMs with or without SPARC (1, 5 µg/ml) treatment measured by seahorse mitostress assay (n=3). (J, K) Quantification of seahorse assay for basal respiration, ATP production coupled respiration, maximum respiration, non-mitochondrial respiration, and spare respiratory capacity (n=3). (L) Basal extracellular acidification rate (ECAR) of M1 and M2 BMDMs with or without SPARC (1, 5, 20 µg/ml) treatment measured by seahorse analyzer (n=3). (M, N) Seahorse assay to detect OCRs for M1, M2, and SPARC (20 µg/ml) treated M2 BMDMs from *Irf3*<sup>-/-</sup> *Irf7*<sup>-/-</sup> mice (M) and *Cgas*<sup>-/-</sup> mice (N) (n=3). (O, P) Seahorse assay to detect OCRs and basal ECAR for M1, M2, and SPARC (20 µg/ml) treated M2 BMDMs with or without iNOS inhibitor (L-NIL, 40 µM) (n=3). (Q) Gene expression analysis for pro-inflammatory and M2 genes in non-treated and SPARC (20 µg/ml, 24 hours) treated M2 BMDMs with or without pre-treatment of glycolysis inhibitor (2-DG, 10 mM) (n=3). (R) Seahorse assay to detect OCRs in M2 polarized BMDMs treated with SPARC (20 µg/ml) for 24 hours with or without pre-treatment of glycolysis inhibitor (2-DG, 10 mM) (n=3). (S) ELISA assay for IFN-β detection in supernatants of SPARC treated M2 BMDMs

with or without pre-treatment of glycolysis inhibitor (2-DG, 10 mM) (n=3). All experiments were repeated independently at least twice. Error bars represent the mean  $\pm$  S.E.M. Two-tailed paired and unpaired t-tests were performed for statistical analysis. \* P < 0.05; \*\* P < 0.01; \*\*\* P < 0.001; \*\*\*\* P < 0.0001.

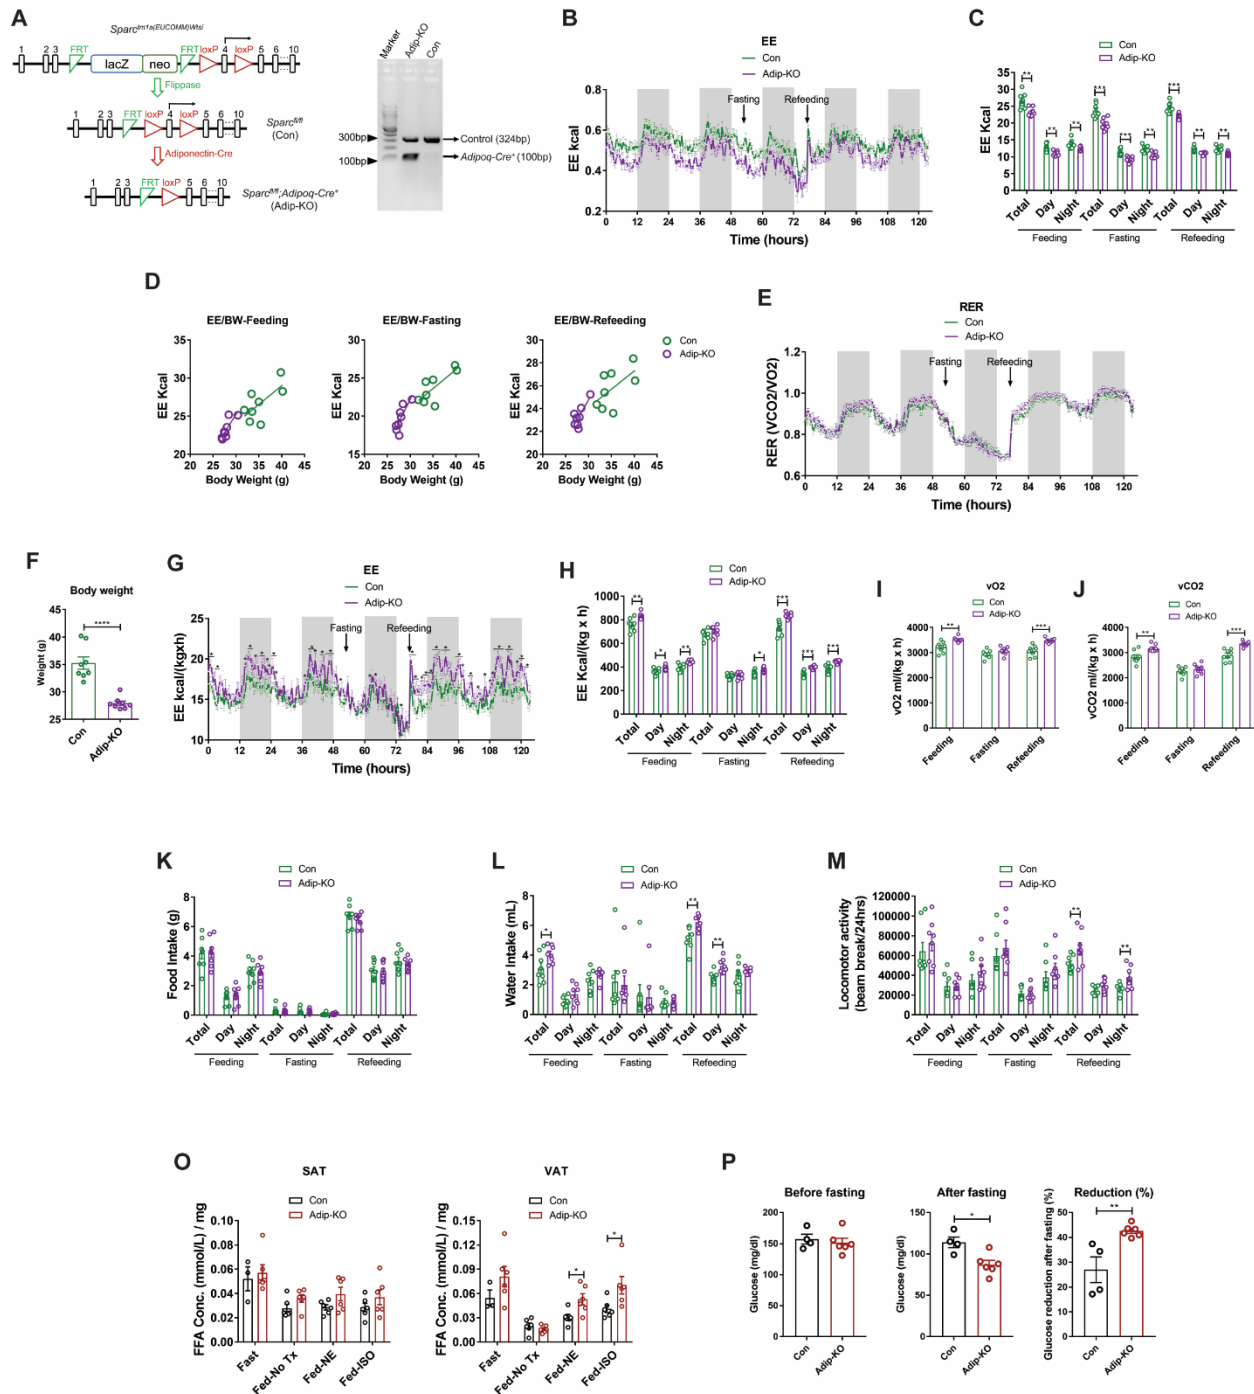

**Figure S6. Enhancement of metabolic healthspan in aged adipocyte-specific SPARC KO, Related to Figure 6.** (A) Schematic of adipo-specific SPARC KO mouse generation (left) and gel electrophoresis of genotyping PCR products with extracted genomic DNA from Con and Adip-KO mice (right). Control (324bp) is the product for positive control genotyping PCR, and

Adipoq-Cre<sup>+</sup> (100bp) is the product for Adipoq-Cre construct genotyping PCR. (B-E) Analysis results from metabolic cage experiments. Unnormalized EE (B, C), comparison of linear regression lines (D), and RER (E) of 20-month-old control and Adip-KO mice with fasting (24 hr) and refeeding (48 hr) measured in metabolic cages (n=8, 8). (F-J) Body weight (F) normalized parameters detected in metabolic cages. EE (G, H), vO<sub>2</sub> (I), vCO<sub>2</sub> (J), and food intake (K), water intake (L), and locomotor activity (M) of 20-month-old control and Adip-KO mice. (O) FFA analysis with explant of SAT and VAT from 22-month-old control and Adip-KO mice with lipolysis. FFA concentrations released from adipose tissue was measured with 24 hr fasting (n=3, 6) and either norepinephrine (NE) or isoproterenol (ISO) incubation in fed condition (n=6, 6). (P) Glucose concentrations before and after 24 hr fasting of 22-month-old control and Adip-KO mice (n=4, 6). All *in vitro* or *ex vivo* experiments were repeated independently at least twice. Error bars represent the mean ± S.E.M. Two-tailed unpaired t-tests were performed for statistical analysis. \* P < 0.05; \*\* P < 0.01; \*\*\* P < 0.001.

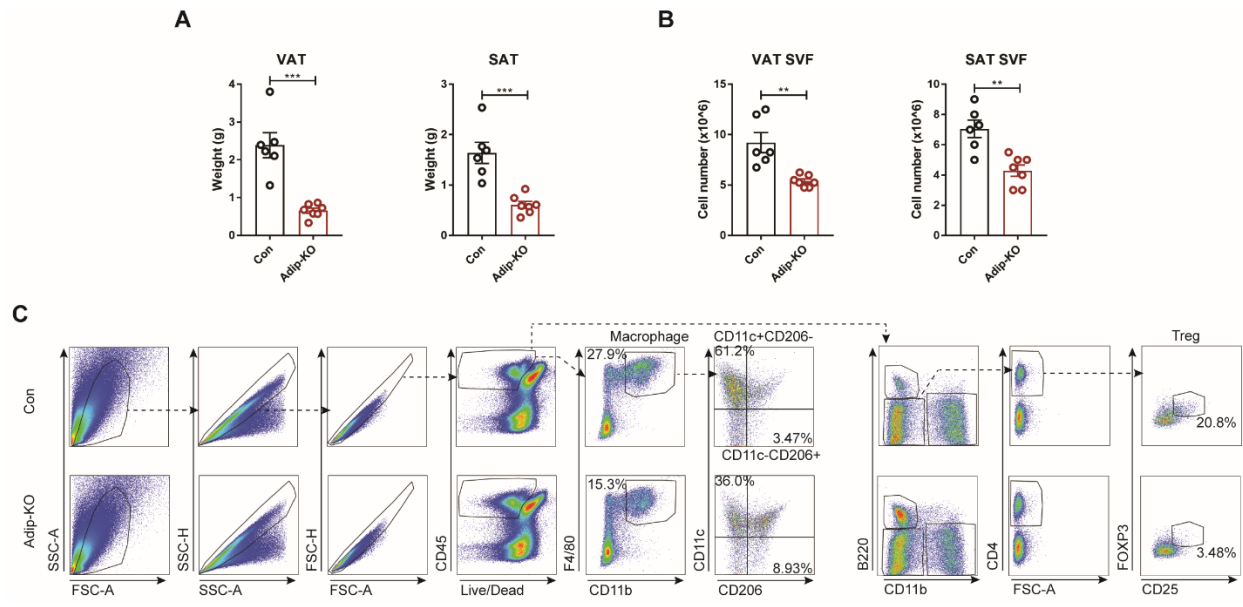

**Figure S7. Aging-related adipose immune cell dysregulation is attenuated in adipocyte specific SPARC KO mice, Related to Figure 7.** (A, B) Adipose tissue weight (A), and SVF cell number in adipose tissue (B) in 22-month-old control and Adip-KO mice (n=6, 7). (C) Gating plot of FACS analysis to detect CD11c<sup>+</sup> CD206<sup>-</sup> and CD11c<sup>-</sup> CD206<sup>+</sup> macrophages and Tregs in SVF of 22-month-old control and Adip-KO mice. All *in vitro* or *ex vivo* experiments were repeated independently at least twice. Error bars represent the mean  $\pm$  S.E.M. Two-tailed unpaired t-tests were performed for statistical analysis. \*\* P < 0.01; \*\*\* P < 0.001.

**Table S1. Primer information for qPCR, Related to STAR METHODS.**

| <b>Gene</b>      | <b>Direction</b> | <b>5'-3'</b>              |
|------------------|------------------|---------------------------|
| <i>Il1b</i>      | Forward          | GGTCAAAGGTTTGAAGCAG       |
|                  | Reverse          | TGTGAAATGCCACCTTTTGA      |
| <i>Tnf</i>       | Forward          | TCTCAGCCTCTTCTCATT        |
|                  | Reverse          | AGAAGCTGATGAGAGGGAG       |
| <i>Il6</i>       | Forward          | AGACAAAGCCAGAGTCCTTCAGAG  |
|                  | Reverse          | TTGGTCCTTAGCCACTCCTTCTGT  |
| <i>Nos2</i>      | Forward          | CCCTCCTGATCTTGTGTTGG      |
|                  | Reverse          | GGCAGTGCATACCACTTCAA      |
| <i>Stat1</i>     | Forward          | TCACAGTGGTTCGAGCTTCAG     |
|                  | Reverse          | GCAAACGAGACATCATAGGCA     |
| <i>Retnla</i>    | Forward          | ACTTCTTGCCAATCCAGCTAAC    |
|                  | Reverse          | CAAGCACACCCAGTAGCAGT      |
| <i>Chil3</i>     | Forward          | CTGGAATTGGTGCCCTACAA      |
|                  | Reverse          | AGACCTCAGTGGCTCCTTCAT     |
| <i>Socs2</i>     | Forward          | CAAACAGGATGGTACTGGGGA     |
|                  | Reverse          | CCAGCTGACGTCTTAACGGAT     |
| <i>Gapdh</i>     | Forward          | TCAACAGCAACTCCCCTCTTCCA   |
|                  | Reverse          | ACCCTGTTGCTGTAGCCGATTCA   |
| <i>18S</i>       | Forward          | AACCCGTTGAACCCATT         |
|                  | Reverse          | CCATCCAATCGGTAGTAGCG      |
| <i>Ifit2</i>     | Forward          | ACAGCAGACAGTTACACAGCA     |
|                  | Reverse          | TCAGGTTCCAGGTGAAATGGC     |
| <i>Isg15</i>     | Forward          | GGGACCTAGAGCTAGAGCCTG     |
|                  | Reverse          | AGTTAGTCACGGACACCAGGA     |
| <i>Xaf1</i>      | Forward          | GAGACGAGACGGCCTATGAC      |
|                  | Reverse          | GTGAGCTAACCTCTGGCACT      |
| <i>Ifit3</i>     | Forward          | GTGGTGGATTCTTGGCAGTT      |
|                  | Reverse          | GACACACTTCCGGTTGTCCT      |
| <i>Tert</i>      | Forward          | CTAGCTCATGTGTCAAGACCCTCTT |
|                  | Reverse          | GCCAGCACGTTTCTCTCGTT      |
| <i>Dloop3</i>    | Forward          | TCTCCGTGAAACCAACAA        |
|                  | Reverse          | AGCGAGAAGAGGGGCATT        |
| <i>ND4</i>       | Forward          | AACGGATCCACAGCCGTA        |
|                  | Reverse          | AGTCCTCGGGCCATGATT        |
| <i>hSPARC</i>    | Forward          | GAACCACCACTGCAAACACG      |
|                  | Reverse          | TGTCATTGCTGCACACCTTC      |
| <i>hSPARC D1</i> | Forward          | CAAGAAGCCCTGCCTGATG       |
|                  | Reverse          | TCTTCGGTTTCCTCTGCACC      |
| <i>hSPARC D2</i> | Forward          | CCCCATTGGCGAGTTTGAGA      |
|                  | Reverse          | TTGCAAGGCCCGATGTAGTC      |
| <i>hSPARC D3</i> | Forward          | CCCTGTACACTGGCAGTTCG      |
|                  | Reverse          | GCAATGCTCCATGGGGATGA      |
| <i>Calcr1</i>    | Forward          | AGGCGTGAACCAAACAGACT      |
|                  | Reverse          | TTCCAGCATAGCCATCCGTC      |
| <i>Pde3e</i>     | Forward          | ACATGGGGCTCTTTGAAGCC      |
|                  | Reverse          | CGTGTAGAACATCGGTGGCA      |
| <i>Ppara</i>     | Forward          | GACAAGGCCTCAGGGTACCA      |
|                  | Reverse          | GCCGAATAGTTCGCCGAAA       |
| <i>Gdf3</i>      | Forward          | AGGTCCTACTATAACCTGCG      |
|                  | Reverse          | CATATGCATCAGAGCCTGCA      |
| <i>Gdf15</i>     | Forward          | CATCACTAGGCCCCCTGAAGC     |
|                  | Reverse          | AGAGTTGCCTGCACAGTCTC      |
| <i>Casp1</i>     | Forward          | GGACCCTCAAGTTTGCCTT       |
|                  | Reverse          | AGACGTGTACGAGTGGTTGT      |
